# Supplementary material
Source: PubMed Central journal article supplement (PMC3338976)
Supplement: 97320630008319S1.pdf [file 97320630008319S1.pdf]

## Supplementary material:

**Table 1:** Cavity information for modelled GST of *M. incognita*

| Cavity Name | Volume (Å <sup>3</sup> ) | Surface Area (Å <sup>2</sup> ) |
|-------------|--------------------------|--------------------------------|
| Cav1        | 489.472                  | 1491.2                         |
| Cav2        | 130.048                  | 344.32                         |
| Cav3        | 17.92                    | 66.56                          |

**Table 2:** Result of *in silico* docking analysis

| Phytochemical (Molecular Formula)                                       | MolDock score | Rerank score | Number of hydrogen bonds | Interacting residues                                   |
|-------------------------------------------------------------------------|---------------|--------------|--------------------------|--------------------------------------------------------|
| Alpha pinene (C <sub>10</sub> H <sub>16</sub> )                         | -71.48        | -60.31       | 1                        | Thr164                                                 |
| Alpha terpineol(C <sub>10</sub> H <sub>18</sub> O)                      | -70.91        | -68.91       | 2                        | Gly49, Gln50                                           |
| Beta caryophyllene (C <sub>15</sub> H <sub>24</sub> )                   | -97.15        | -88.36       | 1                        | Gly165                                                 |
| Capsaicin (C <sub>18</sub> H <sub>27</sub> NO <sub>3</sub> )            | -92.075       | -91.54       | 3                        | Gly99, Val100, Val02                                   |
| Cinnamic acid (C <sub>9</sub> H <sub>8</sub> O <sub>2</sub> )           | -80.85        | -65.39       | 3                        | Phe110, Phe112, Arg113                                 |
| Citronellol (C <sub>10</sub> H <sub>20</sub> O)                         | -66.44        | -59.67       | 3                        | Gly99, Val100, Val02                                   |
| Curcumin (C <sub>21</sub> H <sub>20</sub> O <sub>6</sub> )              | -89.589       | -79.51       | 7                        | Ile168, Glu169, Met170, Tyr197, Lys200, Lys202, Cys203 |
| Eugenol (C <sub>10</sub> H <sub>12</sub> O <sub>2</sub> )               | -86.18        | -76.95       | 3                        | Phe110, Phe112, Arg113                                 |
| Geraniol (C <sub>10</sub> H <sub>18</sub> O)                            | -84.92        | -74.32       | 3                        | Phe110, Phe112, Arg113                                 |
| Isoeugenol (C <sub>10</sub> H <sub>12</sub> O <sub>2</sub> )            | -77.97        | -70.46       | 4                        | His162, Phe163, Thr164, Gly165                         |
| Linalool (C <sub>10</sub> H <sub>18</sub> O)                            | -88.94        | -79.83       | 4                        | Phe158, Ser159, Val160, Ala161                         |
| Myristicin (C <sub>11</sub> H <sub>12</sub> O <sub>3</sub> )            | -94.74        | -86.88       | 1                        | Met166                                                 |
| Neral (C <sub>10</sub> H <sub>16</sub> O)                               | -84.07        | -66.59       | 1                        | Gly165                                                 |
| N-vanillylnonanamide (C <sub>17</sub> H <sub>27</sub> NO <sub>3</sub> ) | -81.35        | -56.74       | 3                        | Met167, Ile168, Glu169                                 |
| Piperine (C <sub>17</sub> H <sub>19</sub> NO <sub>3</sub> )             | -79.50        | -60.33       | 2                        | Phe93, Leu94                                           |
| Vanillin (C <sub>8</sub> H <sub>8</sub> O <sub>3</sub> )                | -76.08        | -41.84       | 2                        | Met170, Glu171                                         |

**Table 3:** *In vitro* GST assay

| Phytochemical Treatments              | GST-activity (Units*) | Percentage of inhibition |
|---------------------------------------|-----------------------|--------------------------|
| Control (+CDNB without phytochemical) |                       | 119.67                   |
| <i>alpha</i> - pinene                 | 17.33                 | 85.52                    |
| <i>apha</i> - terpineol               | 7                     | 94.152                   |
| <i>beta</i> - caryophyllene           | 0.167                 | 99.86                    |
| capsaicin                             | 6.33                  | 94.71                    |
| Cinnamic acid                         | 9.33                  | 92.20                    |
| citronellol                           | 30                    | 74.93                    |
| curcumin                              | 9                     | 92.48                    |
| eugenol                               | 1.67                  | 98.61                    |
| geraniol                              | 8.67                  | 92.76                    |
| isoeugenol                            | 14                    | 88.31                    |
| linalool                              | 13                    | 89.14                    |
| myristicin                            | 0.67                  | 99.44                    |
| neral                                 | 9.33                  | 92.20                    |
| NVA (N-vanillylnonanamide)            | 12.67                 | 89.42                    |
| piperine                              | 13                    | 89.14                    |
| vanillin                              | 15                    | 87.47                    |

**Table 4:** Results for *in vitro* bioassay

| Phytochemical               | Mortality rate in different concentration of compounds |                       |                        |                        |
|-----------------------------|--------------------------------------------------------|-----------------------|------------------------|------------------------|
|                             | 25 µgml <sup>-1</sup>                                  | 50 µgml <sup>-1</sup> | 100 µgml <sup>-1</sup> | 200 µgml <sup>-1</sup> |
| Control                     |                                                        |                       | 98.6                   |                        |
| <i>Beta</i> - caryophyllene | 60.3                                                   | 69.6                  | 76.6                   | 78                     |
| Eugenol                     | 34                                                     | 48                    | 56.3                   | 61.6                   |
| Cinnamic acid               | 40                                                     | 46.6                  | 51                     | 55                     |
| N-vanillylnonanamide        | 30                                                     | 39                    | 43.5                   | 49                     |
